# Supplementary material for: Isolation, Identification, and Whole Genome Analysis of Chicken Infectious Anemia Virus in an Outbreak of Disease in Adult Layer Hens
Source: Preprints.org preprint supplement (doi:10.20944/preprints202306.0404.v1), 2023-06-06
Supplement: Supplementary file 1 [file supplementary]

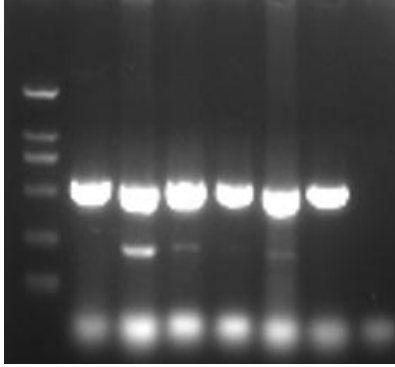

Figure 2 PCR detection results of the 6 clinical samples suspected to be CIAV positive

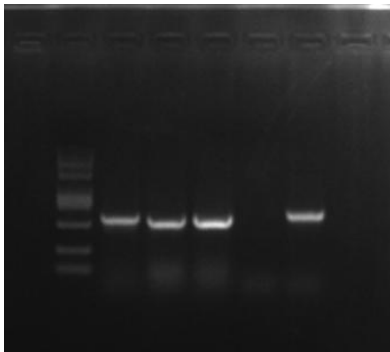

Figure 3 PCR detection results of three consecutive propagations

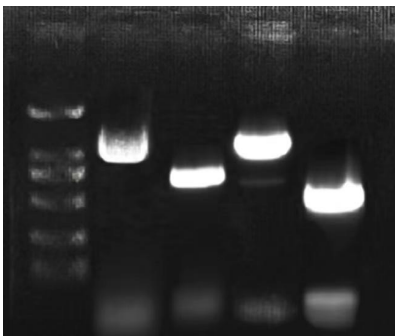

Figure 4 GX21121 whole gene amplification electrophoresis results
